# Supplementary material for: Determination of Selenomethionine, Selenocystine, and Methylselenocysteine in Egg Sample by High Performance Liquid Chromatography—Inductively Coupled Plasma Mass Spectrometry
Source: MDPI journal article supplement (doi:10.3390/separations9020021), 2022-01-18
Supplement: s1 [file s1]

## Supplementary materials

# Determination of selenomethionine, selenocystine and methylselenocysteine in egg sample by high performance liquid chromatography - inductively coupled plasma mass spectrometry

Yue Zhao <sup>1,2</sup>, Min Wang <sup>1,2,\*</sup>, Mengrui Yang <sup>1,2</sup>, Jian Zhou <sup>1,2</sup> and Tongtong Wang <sup>1,2</sup>

<sup>1</sup> Institute of Quality Standards and Testing Technology for Agro-Products, Chinese Academy of Agricultural Sciences, Beijing 100081, P.R. China;

<sup>2</sup> Key Laboratory of Agro-Product Safety and Quality, Ministry of Agriculture and Rural Affairs, Beijing 100081, P.R. China.

zhaoyuecaas@163.com (Y.Z.); yangmengrui2014@163.com (M.Y.); zhoujian\_8382@163.com (J.Z.); wangtong123@126.com (T. W.)

\*Corresponding author:

E-mail: wangmin@caas.cn

**Figure S1** HPLC–ICP–MS chromatograms by Agilent SB-Aq column of egg sample extracted by different extraction procedures: (A) Extraction with ultrapure water; (B) Extraction with HCl (0.1 M); (C) Extraction with NaOH (0.1 M); (D) Extraction with 20 mM ammonium acetate solution containing 5% of methanol (v/v); (E) Hydrolysis with protease XIV. Gray short dash line represents the HPLC–ICP–MS chromatogram of a mixture of Se species at 50 µg L<sup>-1</sup> (as Se) in solution on Agilent SB-Aq column.

**Figure S2** HPLC–ICP–MS chromatograms by Agilent SB-Aq column of regular egg (red line) and Se-enriched egg (blue line). Gray short dash line represents the HPLC–ICP–MS chromatogram of a mixture of Se species at 50 µg L<sup>-1</sup> (as Se) in solution on Agilent SB-Aq column.

**Table S1.** Analytical performances of five Se species.

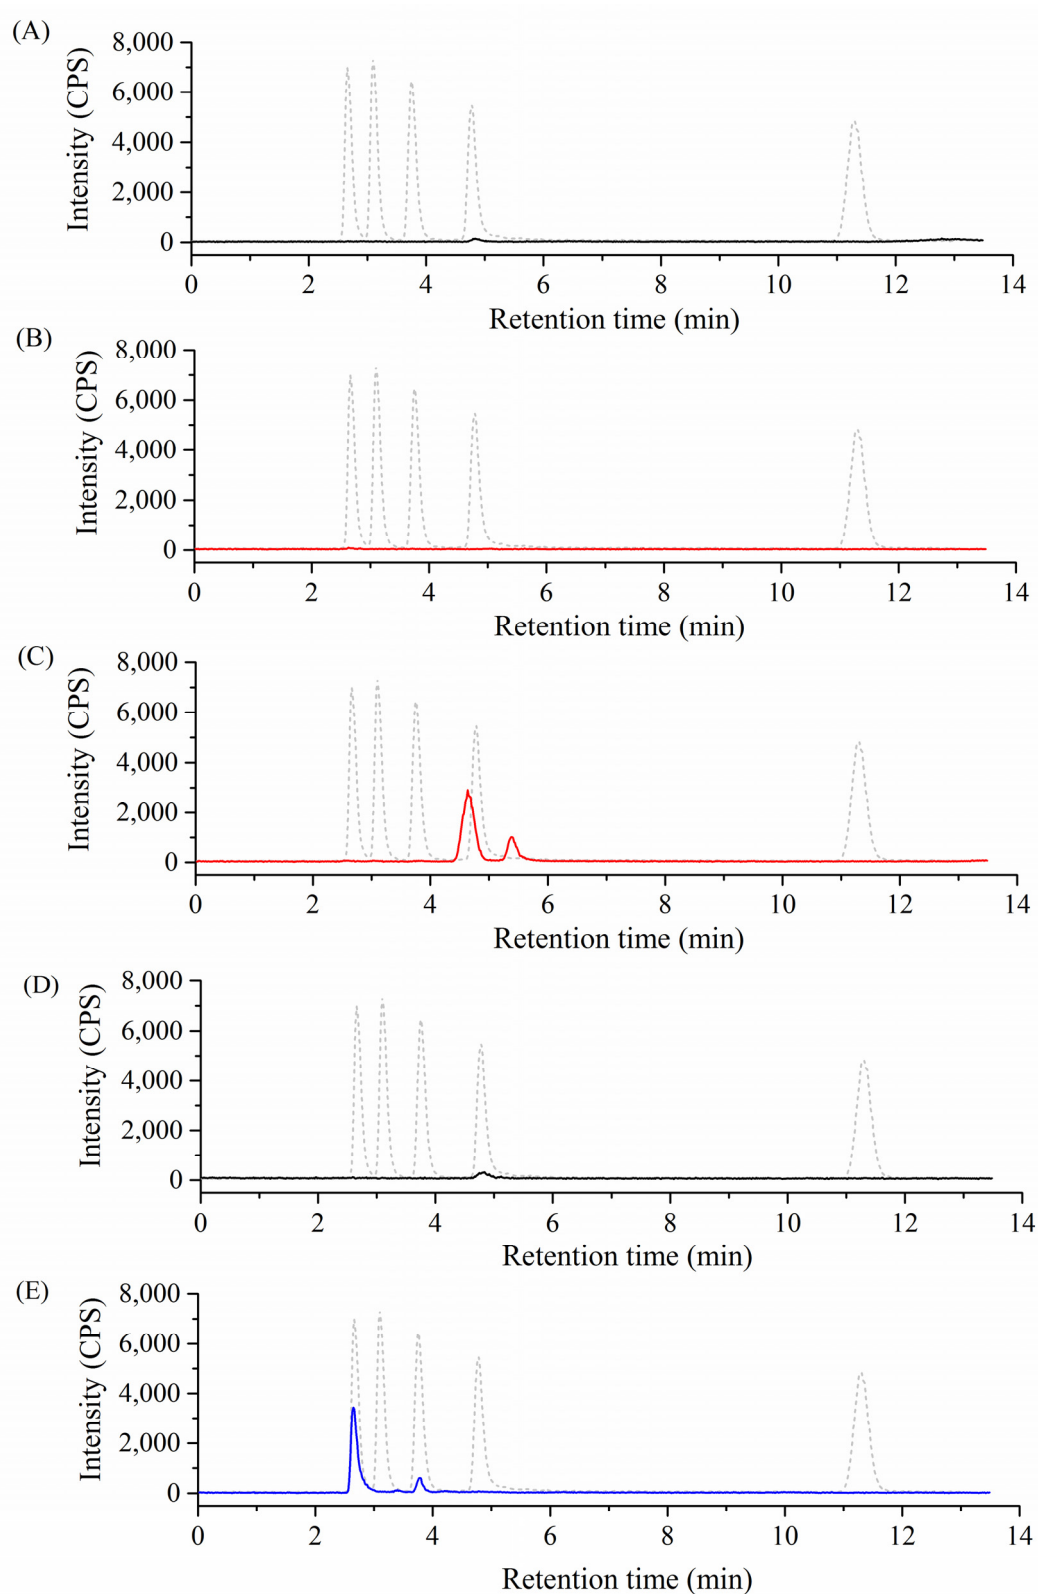

**Figure S1.** HPLC–ICP–MS chromatograms by Agilent SB-Aq column of egg sample extracted by different extraction procedures: (A) Extraction with ultrapure water; (B) Extraction with HCl (0.1 M); (C) Extraction with NaOH (0.1 M); (D) Extraction with 20 mM ammonium acetate solution containing 5% of methanol (v/v); (E) Hydrolysis with protease

XIV. Gray short dash line represents the HPLC–ICP–MS chromatogram of a mixture of Se species at  $50 \mu\text{g L}^{-1}$  (as Se) in solution on Agilent SB-Aq column.

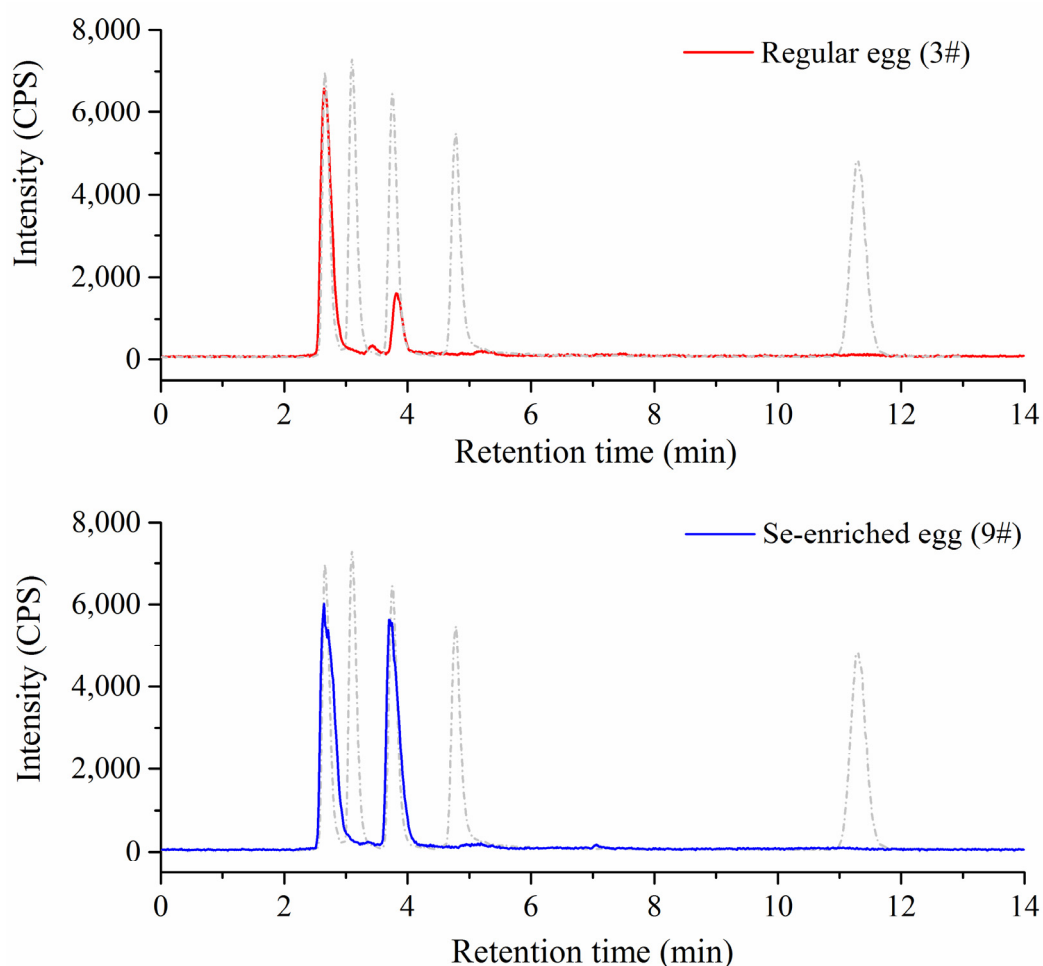

**Figure S2.** HPLC–ICP–MS chromatograms by Agilent SB-Aq column of regular egg (red line) and Se-enriched egg (blue line). Gray short dash line represents the HPLC–ICP–MS chromatogram of a mixture of Se species at  $50 \mu\text{g L}^{-1}$  (as Se) in solution on Agilent SB-Aq column.

**Table S1.** Analytical performances of five Se species.

| Se species         | RT (min) <sup>a</sup> | Regression equation <sup>b</sup> | Linear range ( $\mu\text{g L}^{-1}$ ) | Correlation coefficient ( <i>r</i> ) | LOD ( $\mu\text{g L}^{-1}$ ) | LOQ ( $\mu\text{g L}^{-1}$ ) |
|--------------------|-----------------------|----------------------------------|---------------------------------------|--------------------------------------|------------------------------|------------------------------|
| SeCys <sub>2</sub> | $2.67 \pm 0.01$       | $y = 1201.2x - 622.1$            | 2–100                                 | 0.9996                               | 0.56                         | 1.86                         |
| MeSeCys            | $3.11 \pm 0.01$       | $y = 1181.4x + 988.66$           | 2–100                                 | 0.9997                               | 0.49                         | 1.62                         |
| SeMet              | $3.77 \pm 0.02$       | $y = 1205.5x + 456.8$            | 2–100                                 | 0.9997                               | 0.55                         | 1.82                         |
| Se (IV)            | $4.83 \pm 0.04$       | $y = 1149.1x - 142.2$            | 3–100                                 | 0.9999                               | 0.71                         | 2.37                         |
| Se (VI)            | $11.46 \pm 0.08$      | $y = 1662.6x + 746.1$            | 2–100                                 | 0.9998                               | 0.59                         | 1.98                         |

<sup>a</sup> Retention time (RT) is expressed as the mean  $\pm$  SD of 60 replicates.

---

<sup>b</sup> Standard curves were constructed with six points ( $n = 6$ ) from seven replicates;  $x$  and  $y$  in the equations are the concentrations and corresponding peak areas, respectively.
